# Supplementary material
Source: publisher figshare collection journal article supplement (https://gsapubs.figshare.com/ndownloader/files/23296415)
Supplement: Supplementary file 1 [file 23296415]

## Sheet: Sheet1
Sample	comment	(238U)/(232Th)	1 s.e.	(230Th)/(232Th)	1 s.e.	U
well NL-1 (N 32° 24' 33.873" W 115° 12' 42.055")						ppm
3138C_z1@1	zircon interior	2.22625	0.0289693	1.55369	0.126104	606.985
3138C_z3@1	zircon interior	2.09543	0.027403	1.25506	0.20532	748.543
3138C_z4@1	zircon interior	3.40422	0.0556923	1.77602	0.310087	262.97
3138A_z1@1	zircon interior	3.44447	0.0466833	1.99809	0.215386	472.246
3138A_z2@1B	zircon interior	2.97869	0.0482448	1.42787	0.0829677	469.534
3129A_1@1	zircon interior	2.90681	0.0515313	1.38774	0.122016	307.134
3129A_1@2	zircon interior	2.08853	0.0275459	1.39668	0.106697	432.344
3129B_1@1	zircon interior	2.45368	0.0421831	1.59369	0.08955	616.826
3129C_1@1	zircon interior	3.39271	0.153058	1.72169	0.165654	299.386
3129C_1@2	zircon interior	3.64286	0.0477791	1.72727	0.194519	193.392
3129C_1@4	zircon interior	3.68886	0.0530959	1.99801	0.181595	167.746
3129C_2@1	zircon interior	2.23632	0.0531545	1.28492	0.0706227	559.645
3129C_2@4	zircon interior	2.18456	0.0297084	1.28959	0.12344	1098.68
3129C_1@5	zircon interior	2.02269	0.0803842	1.29673	0.115454	634.491
3138C_all3@1	allanite interior	0.0901793	0.00878988	0.764857	0.119876	-
isochron age: 36 +15/-14 ka (2σ; MSWD = 1.2)
well NL-1 (N 32° 24' 33.873" W 115° 12' 42.055")
NL1_3327_z@1	zircon rim	5.53774	0.156179	5.55078	0.20779	993.987
NL1_3327_z@2	zircon rim	3.33747	0.0485442	3.62816	0.122434	322.261
NL1_3327_z@3	zircon rim	6.64643	0.180742	6.6742	0.272364	345.07
NL1_3327_z@4	zircon rim	3.77638	0.0646517	3.87861	0.110163	655.892
xenocrysts
well E30 (N 32° 23' 57.086" W 115° 12' 51.315")
E30_3027_z@24	zircon rim	3.43722	0.0891481	1.6265	0.321875	76.7288
E30_3027_z@25	zircon rim	3.55977	0.0706573	1.07882	0.144917	151.295
E30_3027_z@26	zircon rim	3.24341	0.0638717	0.918227	0.121064	178.011
E30_3027_z@27	zircon rim	3.50562	0.0563321	0.966911	0.14094	114.396
E30_3027_z@28	zircon rim	3.15791	0.0750751	1.0644	0.127441	100.724
E30_3027_z@29	zircon rim	3.21491	0.0697473	1.18623	0.139475	110.768
E30_3027_z@30	zircon rim	3.65383	0.0710329	1.02134	0.162368	92.4931
E30_3027_z@31	zircon rim	3.49422	0.0637252	1.24247	0.1273	138.321
E30_3027_z@32	zircon rim	3.29186	0.0526043	1.37327	0.131482	128.974
E30_3027_z@33	zircon rim	3.58827	0.071542	1.26278	0.165082	91.377
E30_3027_z@34	zircon rim	3.37452	0.0590296	1.10984	0.199928	120.673
E30_3027_z@35	zircon rim	3.41727	0.0606444	0.99586	0.151486	107.49
E30_3027_z@36	zircon rim	3.80773	0.140041	1.42627	0.364639	53.1103
E30_3027_ts_diamond@1	zircon interior	2.70902	0.0411611	0.677711	0.100656	163.223
E30_3027_ts_india@1	zircon interior	4.21245	0.122541	0.882489	0.244535	65.345
E30_3027_ts_india@2	zircon interior	2.30259	0.0771358	0.813966	0.0734139	179.336
E30_3027_ts_box@1	zircon interior	1.85399	0.0226302	0.702805	0.0415762	525.104
E30_3027_z_int@24	zircon interior	3.24979	0.0218818	1.25519	0.171234	147.09
E30_3027_z_int@25	zircon interior	3.11223	0.0202248	1.1308	0.137896	192.625
E30_3027_z_int@26	zircon interior	2.96035	0.00673852	1.00687	0.132081	170.797
E30_3027_z_int@27	zircon interior	3.86307	0.0246151	1.56848	0.331802	82.6208
E30_3027_z_int@28	zircon interior	3.63667	0.0263153	1.80865	0.318038	91.9313
E30_3027_z_int@29	zircon interior	2.79929	0.0551425	1.00224	0.139905	187.07
E30_3027_z_int@30	zircon interior	3.69398	0.0254149	1.66427	0.400147	76.9798
E30_3027_z_int@31	zircon interior	2.65113	0.00728744	1.06311	0.0983066	177.291
E30_3027_z_int@32	zircon interior	2.66775	0.0389647	1.18402	0.143142	191.608
E30_3027_z_int@33	zircon interior	4.03215	0.0149683	1.53386	0.338057	75.0003
E30_3027_z_int@34	zircon interior	3.34436	0.0209594	1.22974	0.201122	123.618
E30_3027_z_int@35	zircon interior	3.24692	0.0313316	1.59559	0.23577	112.352
E30_3027_z_int@36	zircon interior	4.51646	0.0175748	1.60115	0.611039	43.595
E30_3027_z_int@37	zircon interior	4.10379	0.0254174	2.136	0.336906	65.236
E30_3027_z_int@38	zircon interior	4.69414	0.0195394	1.91591	0.333883	76.2913
E30_3027_z@1	zircon rim	3.48538	0.0390997	0.744487	0.292071	95.6356
E30_3027_z@2	zircon rim	3.44743	0.0689548	1.19995	0.271651	124.854
E30_3027_z@3	zircon rim	2.79181	0.0800294	1.51085	0.183592	167.744
E30_3027_z@4	zircon rim	2.77809	0.0780082	1.10857	0.108654	205.707
E30_3027_z@5	zircon rim	3.69847	0.0387603	1.44603	0.427423	88.0014
E30_3027_z@6	zircon rim	3.33651	0.0531689	1.24343	0.22243	107.226
E30_3027_z@7	zircon rim	3.22266	0.0726669	1.80041	0.226864	122.147
E30_3027_z@8	zircon rim	4.56836	0.169526	5.12575	0.411113	399.06
E30_3027_z@9	zircon rim	2.82421	0.0604599	0.903315	0.1924	142.898
E30_3027_z@10	zircon rim	3.18179	0.0650092	1.27907	0.272158	138.456
E30_3027_z@11	zircon rim	3.64301	0.0398614	2.15925	0.440408	80.506
E30_3027_z@12	zircon rim	3.3511	0.0629493	1.33534	0.272864	106.393
E30_3027_z@13	zircon rim	3.31607	0.0473111	1.06088	0.269881	144.633
E30_3027_z@14	zircon rim	3.5496	0.0436116	1.45064	0.229377	128.81
E30_3027_z@15	zircon rim	5.2485	0.14987	5.92489	0.428083	132.418
E30_3027_z@16	zircon rim	3.04752	0.0553687	1.4234	0.17477	192.243
E30_3027_z@17	zircon rim	2.65578	0.120322	1.37237	0.20277	143.8
E30_3027_z@18	zircon rim	4.15385	0.0559358	4.36077	0.163081	297.109
E30_3027_z@19	zircon rim	29.5119	1.42619	31.0388	1.95299	1375.54
E30_3027_z@20	zircon rim	3.06795	0.0358344	1.16503	0.193503	192.312
E30_3027_z@21	zircon rim	2.73985	0.0726634	1.0979	0.195097	159.555
E30_3027_z@22	zircon rim	3.5963	0.0372392	0.550035	0.251464	122.841
E30_3027_z@23	zircon rim	3.86778	0.0392462	1.14348	0.326173	78.4933
isochron age: 42 +15/-14 ka (2σ; MSWD = 1.8)
well M-201 (N 32° 24' 34.768" W 115° 10' 23.248")
M201_3080_z@1	zircon rim	2.09397	0.0483453	2.26946	0.102509	467.348
M201_3080_z@2	zircon rim	1.77476	0.0310883	2.0191	0.0853056	336.002
M201_3080_z@3	zircon rim	2.13558	0.0240799	2.17156	0.0609045	441.749
M201_3080_z@4	zircon rim	24.9811	0.386928	25.5798	0.550307	1419.48
M201_3080_z@5	zircon rim	4.12979	0.156809	4.67758	0.201553	430.1
M201_3080_z@6	zircon rim	2.82274	0.04946	4.39145	0.214975	92.1443
M201_3080_z@7	zircon rim	8.7897	0.326643	9.20461	0.360206	921.443
xenocrysts
Lava samples CP-09-04 (N 32° 25' 26" W 115° 18' 3") and CP05-2 (N 32° 25' 25" W 115° 18' 5")
CP09-4_z3_UTh@1	zircon interior	2.85846	0.0317323	1.69775	0.201394	190.241
CP09-4_z3_UTh@2	zircon interior	2.75243	0.0291338	2.09209	0.314883	161.082
CP09-4_z3_UTh@3	zircon interior	2.63517	0.0301657	1.72687	0.232913	173.321
CP09-4_z3_UTh@4	zircon interior	2.45028	0.0239485	1.5266	0.16927	207.889
CP09-4_z3_UTh@5	zircon interior	2.43817	0.0231133	1.30111	0.135623	218.533
CP0502_g1_s1	zircon interior	1.91047	0.00850507	1.46405	0.17576	73.9119
CP0502_g4_s1	zircon interior	2.88183	0.0104015	2.69952	0.106527	498.82
CP0502_g8_s1	zircon interior	0.996361	0.00771701	0.705227	0.0327847	862.191
CP0502_g9_s1	zircon interior	1.55674	0.00954443	0.915393	0.0809521	89.21
isochron age: 86 +37/-33 ka (2σ; MSWD = 1.8)
Lava sample RC-01 (N 31° 06' 45" W 114° 29' 17")
RC_z1@1	zircon	2.12718	0.032887	2.24503	0.15205	179.032
RC_z1@2	zircon	14.5418	0.31931	13.5203	0.544383	362.062
RC_z19_UTh@1	zircon	2.41003	0.0352591	2.05969	0.0751919	5157.93
RC_z27_UTh@1	zircon	3.37375	0.049054	3.41452	0.178313	592.235
RC_z49_UTh@1	zircon	10.06	0.240198	12.4056	0.979566	676.06
xenocrysts (with the exception of RC z19)
Analytical errors are 1σ of the mean.
Activity ratios calculated using constants of 9.1577 x 10-6 yr-1 for 230Th, and 4.9475 x 10-6 yr-1 for 232Th (Cheng et al., 2000)
